# Supplementary material
Source: PubMed Central journal article supplement (PMC4788009)
Supplement: smis804997.ww2_default.pdf [file smis804997.ww2_default.pdf]

**Appendix 2: Specific topics discussed in the peer support meetings [posted as supplied by author]**

|                                                          |                                                                                                                                                                                                                                                                                                                                                                                                                                                                                                                     |
|----------------------------------------------------------|---------------------------------------------------------------------------------------------------------------------------------------------------------------------------------------------------------------------------------------------------------------------------------------------------------------------------------------------------------------------------------------------------------------------------------------------------------------------------------------------------------------------|
| <p><b>Meeting 1</b><br/>Introduction</p>                 | <p>Medical issues- Causes of diabetes, prevention of diabetes, glycaemic control, footcare<br/>General issues- Identification bracelets/ cards for people with diabetes</p>                                                                                                                                                                                                                                                                                                                                         |
| <p><b>Meeting 2</b><br/>Heart and vascular disease</p>   | <p>Medication- aspirin, statins, insulin<br/>Exercise- different forms of exercise<br/>Medical issues- skin infections, link between heart disease and diabetes, BMI<br/>Diet- fish, fruit<br/>Footcare- difficulty obtaining chiropody appointments<br/>Blood sugar testing- frequency, effects of stress and alcohol on blood sugar<br/>General issues- Car insurance</p>                                                                                                                                         |
| <p><b>Meeting 3</b><br/>Blood sugar levels</p>           | <p>Medication- safety of Lipitor<br/>Medical issues- glycaemic control, reduction in HbA1c targets, hypoglycaemia, fluctuation of blood glucose levels<br/>Diet- water intake, bedtime snack, white bread, fish oil supplements, safety of complementary therapies, leg cramps, progression on to insulin<br/>Footcare- safety of foot spas</p>                                                                                                                                                                     |
| <p><b>Meeting 4</b><br/>Healthy eating</p>               | <p>Medical issues- aetiology of diabetes, libido and erection problems, problems with injection sites, HbA1c<br/>Diet- trans fats, MSG, artificial sweeteners, fish, food labeling, primrose oil and fish oil supplements<br/>General issues- counseling for people with type 2 diabetes</p>                                                                                                                                                                                                                        |
| <p><b>Meeting 5</b><br/>Medication</p>                   | <p>Medication- medication safety/changing dose of medications, ACE inhibitors, instructions regarding timing of medication taking<br/>Medical issue-dental problems and diabetes, arthritis and diabetes, fluid retention,<br/>Diet- artificial sweeteners, ‘diabetic’ foods<br/>Footcare- nerve damage in the feet<br/>General- difficulties arranging appointments for ophthalmology and chiropody</p>                                                                                                            |
| <p><b>Meeting 6</b><br/>Exercise</p>                     | <p>Medication- side effects of medication<br/>Exercise- what form of exercise can people with mobility problems do<br/>Medical issues- leg cramps, what is potassium, gout, tiredness and sleeping problems, hyperglycaemia<br/>Diet-vitamin and fish oil supplement<br/>Footcare- free chiropody entitlements</p>                                                                                                                                                                                                  |
| <p><b>Meeting 7</b><br/>Foot care</p>                    | <p>Medication-glucosamine<br/>Medical issues- link between sleep apnoea and diabetes, life expectancy with diabetes, leg cramps, neuropathy, erectile dysfunction, difference between optican and ophthalmologist, nephropathy<br/>Diet-sugar content in bananas, stress and cravings for sugar<br/>Footcare- skin problems on the feet, suitable cream for feet, orthotics, poor circulation in the feet, using a hot water bottle or an electric blanket<br/>General issues- compression stockings and flying</p> |
| <p><b>Meeting 8</b><br/>Eye and kidney complications</p> | <p>Exercise- taking food before exercise, exercising with high blood sugars<br/>Medical issues- sleeping problems, retinopathy, nephropathy and neuropathy, BP monitors, heart disease<br/>Diet- sources of protein<br/>General issues- compression stockings, GMS cards</p>                                                                                                                                                                                                                                        |
| <p><b>Meeting 9</b><br/>Living with diabetes</p>         | <p>Medication- sleeping problems and medication,<br/>Diet- convenience foods<br/>Footcare- cold feet and numbness in feet</p>                                                                                                                                                                                                                                                                                                                                                                                       |
